# Supplementary material for: Mining Sources of Resistance to Durum Leaf Rust among Tetraploid Wheat Accessions from CIMMYT’s Germplasm Bank
Source: MDPI journal article supplement (doi:10.3390/plants12010049), 2022-12-22
Supplement: s1 [file s1]

**Table S1.** Intrid and cross or cultivars and seed source origin of durum cultivars tested at seedling in the greenhouse and field of selected seedling resistant.

| Tetraploid accessions |                                                                              | Country       |
|-----------------------|------------------------------------------------------------------------------|---------------|
| Intrid <sup>a</sup>   | Cross or cultivar                                                            | Origin (seed) |
| G5375                 | RL6010/6*YR//2*STIL/MEX75                                                    | CIMMYT        |
| G5369                 | RL6010/6*YR//2*STIL/MEX75                                                    | CIMMYT        |
| CWI20891              | RECIO DE MALAGA                                                              | SPAIN         |
| CWI22027              | FAO29.934                                                                    | CYPRUS        |
| DW5345                | KKC/1381.2                                                                   | TURKEY        |
| G5359                 | DWL5023/CNO79                                                                | CIMMYT        |
| G5392                 | RL6043/3*NAC//2*TCHO                                                         | CIMMYT        |
| DW15671               | SOMAT_3//SOOTY_9/RASCON_37/3/BINTEPE 85/SULA                                 | CIMMYT        |
| G5364                 | DWL5023/CNO79                                                                | CIMMYT        |
| DW15675               | AINZEN_1/6/2*CMH82A.1062/3/GGOVZ394//SBA81/PLC/4/AAZ_1/CREX/5/HUI//CIT71/CII | CIMMYT        |
| CWI21151              | AZIZIAH 12565                                                                | PORTUGAL      |
| CWI20528              | HARLAN J.R 5719                                                              | TURKEY        |
| CWI23230              | PARKER JH 52                                                                 | ETHIOPIA      |
| CWI22327              | HARLAN J.R 14                                                                | JORDAN        |
| CWI32536              | ATSIKI 3                                                                     | GREECE        |
| G6857                 | CMH83.2900                                                                   | CIMMYT        |
| G3543                 | H567.71/CIT71//2*MEX75/2*SHWA                                                | CIMMYT        |
| G8743                 | SN64/3*CIT71                                                                 | CIMMYT        |
| CWI22214              | IAR.W.92.1                                                                   | ETHIOPIA      |
| CWI23460              | ELS6404.156.2                                                                | ETHIOPIA      |
| DW7085                | BROWN SEEDED A1-124                                                          | CIMMYT        |
| G8731                 | CMH82A.1056                                                                  | CIMMYT        |
| G5235                 | TDIC1458/MEX75//CIT71/T.BOEOTICUM                                            | CIMMYT        |
| G5207                 | T.DIC 1460/MEX75//MEXI75/T.MON.2433                                          | CIMMYT        |
| G5394                 | RL6043/3*NAC//2*TCHO                                                         | CIMMYT        |
| DW15673               | SOMAT_3.1//WODUCK/CHAM_3/5/AJAIA_16//HORA/JRO/3/GAN/4/ZAR                    | CIMMYT        |
| G8505                 | DWL5023/NAC                                                                  | CIMMYT        |
| CWI22423              | ISWRN 68-443/GA-A7, PI434878                                                 | SOUTH AFRICA  |
| CWI21666              | G46049, PI264438                                                             | GREECE        |
| CWI20476              | HARLAN J.R 4460                                                              | TURKEY        |
| CWI22683              | Citr 3754                                                                    | RUSSIA        |
| CWI22087              | IAR.W.11.2                                                                   | ETHIOPIA      |
| CWI21791              | CANDICANS 76.10                                                              | RUSSIA        |
| CWI22053              | DUBBIE                                                                       | ISRAEL        |

|          |                                    |            |
|----------|------------------------------------|------------|
| G5208    | T.DIC 1460/MEX75//MEX75/T.MON.2433 | CIMMYT     |
| G5424    | CIT71/2*T.CARTHLICUM               | CIMMYT     |
| DW649    | CRA/P66.270                        | CIMMYT     |
| G3988    | T.DIC 1460/MEXI75                  | CIMMYT     |
| CWI355   | CALIFORNIA ALCALA REAL             | MEXICO     |
| G5421    | CMH77A.682/YAV79                   | CIMMYT     |
| CWI23606 | QUALSET BYDV 6                     | USA        |
| CWI21696 | PI265009                           | YUGOSLAVIA |
| G8813    | KHP*4/D31708                       | CIMMYT     |
| DW7103   | WHITE SEEDED K2-152                | CIMMYT     |
| CWI22175 | IAR.W.63.1                         | ETHIOPIA   |
| CWI20114 | BEYAZ KAPCIK                       | TURKEY     |
| CWI23067 | ABYSSINIAN 31                      | ETHIOPIA   |
| CWI20425 | HARLAN J.R 4497                    | TURKEY     |
| CWI21256 | FELLOWS P8741                      | ETHIOPIA   |
| CWI22139 | IAR.W.42.3                         | ETHIOPIA   |
| CWI22166 | IAR.W.56.2                         | ETHIOPIA   |
| CWI22201 | IAR.W.84.2                         | ETHIOPIA   |
| CWI22089 | IAR.W.12.2                         | ETHIOPIA   |
| CWI22102 | IAR.W.22.3                         | ETHIOPIA   |
| CWI22280 | IAR.W.174.3                        | ETHIOPIA   |
| CWI22064 | IAR.W.1.1                          | ETHIOPIA   |
| CWI22294 | IAR.W.185.1                        | ETHIOPIA   |
| CWI22250 | IAR.W.131.1                        | ETHIOPIA   |
| CWI23359 | MORISCO                            | SPAIN      |
| DW3139   | GORDEIFORME SARI BUGDAY            | TURKEY     |
| CWI23446 | ELS6404.139.7                      | ETHIOPIA   |
| G6904    | CMH84.1106                         | CIMMYT     |
| CWI21737 | HARLAN J.R 1939                    | ETHIOPIA   |
| CWI23440 | ELS6404.131.3                      | ETHIOPIA   |
| CWI22143 | IAR.W.44.2                         | ETHIOPIA   |
| CWI23065 | ABYSSINIAN 26                      | ETHIOPIA   |
| CWI23385 | ELS6404.84.3                       | ETHIOPIA   |
| CWI23473 | ELS6404.61.2                       | ETHIOPIA   |

Intrid<sup>a</sup> = CIMMYT Germplasm Bank accession number

**Table S2.** Intrid and cross or cultivar and seed source origin of tetraploid accessions tested against 15 leaf rust races at seedling stage in the greenhouse

|                       |                                                                              | Country       |
|-----------------------|------------------------------------------------------------------------------|---------------|
| Intrid                | Cross or cultivar                                                            | Origin (seed) |
| DW7085 <sup>a</sup>   | BROWN SEEDED A1-124                                                          | CIMMYT        |
| DW7103                | WHITE SEEDED K2-152                                                          | CIMMYT        |
| DW15671               | SOMAT_3//SOOTY_9/RASCON_37/3/BINTEPE 85/SULA                                 | CIMMYT        |
| DW15673               | SOMAT_3.1//WODUCK/CHAM_3/5/AJAIA_16//HORA/JRO/3/GAN/4/ZAR                    | CIMMYT        |
| DW15675               | AINZEN_1/6/2*CMH82A.1062/3/GGOVZ394//SBA81/PLC/4/AAZ_1/CREX/5/HUI//CIT71/CII | CIMMYT        |
| G3988 <sup>b</sup>    | T.DIC 1460/MEX75                                                             | CIMMYT        |
| G5424                 | CIT71/2*T. CARTHLICUM                                                        | CIMMYT        |
| G8731                 | CMH82A.1056                                                                  | CIMMYT        |
| G3543                 | H567.71/CIT71//2*MEX75/2*SHWA                                                | CIMMYT        |
| G6857                 | CMH83.2900                                                                   | CIMMYT        |
| G6904                 | CMH84.1106                                                                   | CIMMYT        |
| DW7147                | DULAX 2                                                                      | CIMMYT        |
| G5359                 | DWL5023/CNO79                                                                | CIMMYT        |
| G5364                 | DWL5023/CNO79                                                                | CIMMYT        |
| G5207                 | T.DIC 1460/MEX75//MEX75/T.MONOCOCCUM.2433.                                   | CIMMYT        |
| G5369                 | RL6010/6*YR//2*STIL/MEX75                                                    | CIMMYT        |
| G5375                 | RL6010/6*YR//2*STIL/MEX75                                                    | CIMMYT        |
| G5394                 | RL6043/3*NAC//2*TCHO                                                         | CIMMYT        |
| CWI23065 <sup>c</sup> | ABYSSINIAN 26                                                                | ETHIOPIA      |
| CWI23440              | ELS6404.131.3                                                                | ETHIOPIA      |
| CWI23446              | ELS6404.139.7                                                                | ETHIOPIA      |
| CWI23473              | ELS6404.61.2                                                                 | ETHIOPIA      |
| CWI23385              | ELS6404.84.3                                                                 | ETHIOPIA      |
| CWI21256              | FELLOWS P8741                                                                | ETHIOPIA      |
| CWI21737              | HARLAN J.R 1939                                                              | ETHIOPIA      |
| CWI22064              | IAR.W.1.1                                                                    | ETHIOPIA      |
| CWI22089              | IAR.W.12.2                                                                   | ETHIOPIA      |
| CWI22294              | IAR.W.185.1                                                                  | ETHIOPIA      |
| CWI22102              | IAR.W.22.3                                                                   | ETHIOPIA      |
| CWI22143              | IAR.W.44.2                                                                   | ETHIOPIA      |
| CWI22166              | IAR.W.56.2                                                                   | ETHIOPIA      |
| CWI22175              | IAR.W.63.1                                                                   | ETHIOPIA      |
| CWI22201              | IAR.W.84.2{                                                                  | ETHIOPIA      |

|          |            |          |
|----------|------------|----------|
| CWI22214 | IAR.W.92.1 | ETHIOPIA |
| CWI20872 | ST483      | ETHIOPIA |

**Table S3. Intrid and cross or cultivar and seed source origin of seedling susceptible in the greenhouse, but adult plant resistant.**

| <b>Intrid<sup>a</sup></b> | <b>Cross or cultivar</b>     | <b>Country<br/>Origin (seed)</b> |
|---------------------------|------------------------------|----------------------------------|
| G5202                     | T.DIC 1460/2*MEX75           | CIMMYT                           |
| DW5199                    | IM//CIT71/CII                | ETHIOPIA                         |
| CWI20826                  | ABISPADO DE LEBRIJA          | SPAIN                            |
| DW4477                    | ASTURIE L2                   | SPAIN                            |
| CWI13539                  | AUSTRALIAN                   | INDIA                            |
| CWI21033                  | CANOCO                       | PORTUGAL                         |
| CWI19754                  | DICKSON J.G 417              | ITALY                            |
| CWI19758                  | DICKSON J.G 429              | PORTUGAL                         |
| CWI26558                  | F10 DURUM                    | BRAZIL                           |
| CWI22230                  | IAR.W.98.4                   | ETHIOPIA                         |
| CWI22921                  | I57581                       | USSR                             |
| CWI22927                  | PI57587                      | USSR                             |
| CWI22466                  | GIZA 39                      | UAR                              |
| CWI23095                  | PI61874                      | MOROCCO                          |
| CWI23602                  | QUALSET BYDV 2               | USA                              |
| CWI75601                  | VIOLET DURUM                 | ETHIOPIA                         |
| DW4192                    | ARRANCADA-P3-13695           | PORTUGAL                         |
| G7358                     | TDIC1458/MEX75//KHP*2/D31708 | CIMMYT                           |
| G7492                     | FTA/CJ71//CMH76A.169/2*MEX75 | CIMMYT                           |
| CWI21086                  | ADDIS ALEM 171               | ETHIOPIA                         |
| CWI20285                  | BARRIGON PUBESCENT           | MEXICO                           |
| CWI23075                  | BELADI 33                    | UAR                              |
| CWI22396                  | BENOR                        | FRANCE                           |
| CWI20657                  | HANSOTI                      | INDIA                            |
| CWI22951                  | PI57659                      | UAR                              |

Intrid = CIMMYT Germplasm Bank accession number.

**Table S4. Intrid and cross or cultivar and seed source of** selected seedling susceptible, but adult plant resistant winter or facultative tetraploid accessions.

| <b>Intrid<sup>a</sup></b> | <b>Cross or cultivar</b>         | <b>Country<br/>Origin (seed)</b> |
|---------------------------|----------------------------------|----------------------------------|
| DW5442                    | BR180/3/60.120/LDS//64.207/4/HAM | TURKEY                           |
| CWI22788                  | BLANCA DE NOLAS                  | SPAIN                            |
| DW4212                    | CAMBRIDGE 1                      | UK                               |
| CWI334                    | ENANO DE FACU                    | MEXICO                           |
| CWI22799                  | ENANO DE JAEN                    | MEXICO                           |
| CWI356                    | ENANO-DE-ANDUJAR                 | MEXICO                           |
| CWI20224                  | HARLAN J.R 3342                  | TURKEY                           |
| CWI22966                  | VAVILOV NI 6931                  | RUSSIA                           |
| CWI22789                  | CANA MACIZA                      | SPAIN                            |
| CWI22035                  | DF68.71                          | RUMANIA                          |
| CWI23196                  | PI68240                          | USSR                             |
| CWI22844                  | AMARELO                          | PORTUGAL                         |
| DW4219                    | CAMBRIDGE 19                     | UK                               |
| CWI20330                  | BELADI BOUHI                     | EGYPT                            |

Intrid = CIMMYT Germplasm Bank accession number
